# Supplementary material
Source: PubMed Central journal article supplement (PMC196934)

**A**

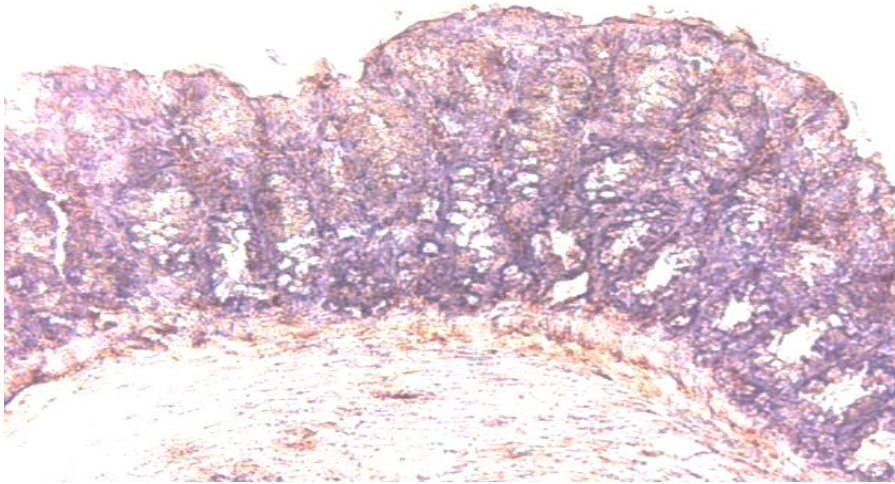

**B**

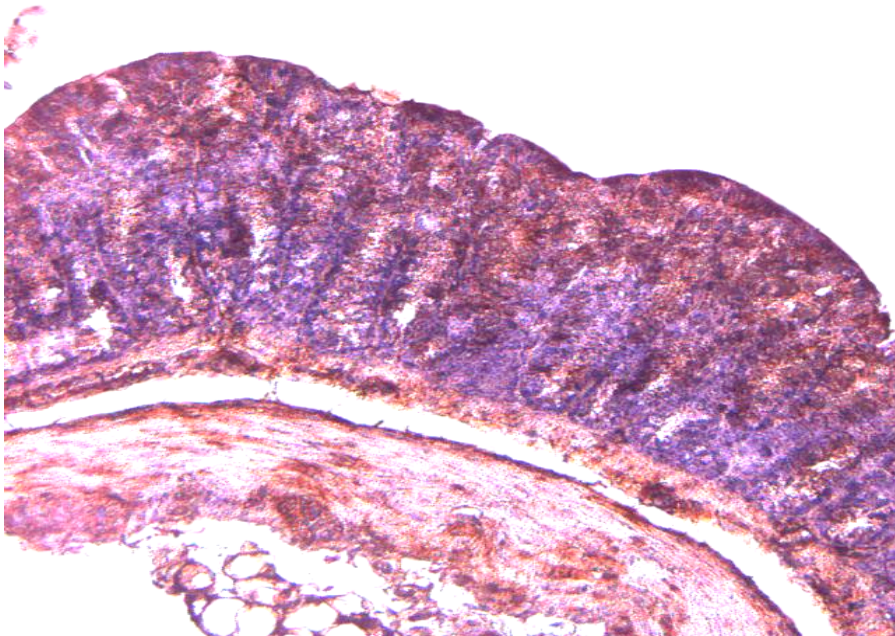

Supplement: pnas_100_19_11104__2.pdf [file pnas_100_19_11104__2.pdf]
